# Supplementary material for: Variation in fine-scale water table depth drives abundance of a unique semi-terrestrial crayfish species
Source: PeerJ. 2024 May 23;12:e17330. doi: 10.7717/peerj.17330 (PMC11128214; doi:10.7717/peerj.17330)
Supplement: Supplemental Information 1 [file peerj-12-17330-s001.xlsx]

## Sheet: Sheet1
Date	order	site	Transect	Quadrate	Site_code	Lattitude	Longitude	domveg	functional_group	phototype	vegcov	soil	wattab	Water_Table	wtreach	canopy	biomass	burrow_presence	burrows_abundance	Restor_stat
2022-05-23	1	1	1	1	S1T1Q1	41.8889	-89.3508	Poaceae	Grass_Sedge	C4	67	SICL	9	Very_Shallow	AT	0.16	1.3779	0	0	Restored_90s
2022-05-23	2	1	1	2	S1T1Q2	41.889	-89.3508	Cyperaceae	Grass_Sedge	C4	47	SIL	12	Shallow	AT	0.16	0.5599	1	1	Restored_90s
2022-05-23	3	1	1	3	S1T1Q3	41.8893	-89.3507	Cyperaceae	Grass_Sedge	C4	80	SIL	16	Shallow	AT	0.16	0.3054	0	0	Restored_90s
2022-05-23	4	1	1	4	S1T1Q4	41.8895	-89.3501	Poaceae	Grass_Sedge	C4	60	SIL	22	Moderatly_Deep	AT	0.16	0.0964	1	1	Restored_90s
2022-05-23	5	1	1	5	S1T1Q5	41.8896	-89.3507	Poaceae	Grass_Sedge	C4	88	SIL	16	Shallow	AT	0.16	1.3358	0	0	Restored_90s
2022-05-23	6	1	1	6	S1T1Q6	41.8898	-89.3507	Poaceae	Grass_Sedge	C4	90	SIL	18	Shallow	AT	0.16	0.5929	0	0	Restored_90s
2022-05-23	7	1	2	1	S1T2Q1	41.8889	-89.3506	Poaceae	Grass_Sedge	C4	50	SIL	9	Very_Shallow	AT	0.16	2.6956	0	0	Restored_90s
2022-05-23	9	1	2	3	S1T2Q3	41.8885	-89.3506	Poaceae	Grass_Sedge	C4	40	SIL	40	Deep	BELOW	0.16	0.848	0	0	Restored_90s
2022-05-24	10	1	2	4	S1T2Q4	41.8884	-89.3506	Poaceae	Grass_Sedge	C4	30	SIL	31	Moderatly_Deep	BELOW	0.16	0.7079	0	0	Restored_90s
2022-05-24	11	1	2	5	S1T2Q5	41.8882	-89.3507	Poaceae	Grass_Sedge	C4	30	L	35	Moderatly_Deep	BELOW	0.16	0.6686	0	0	Restored_90s
2022-05-24	12	1	2	6	S1T2Q6	41.888	-89.3507	Poaceae	Grass_Sedge	C4	40	S	36	Deep	BELOW	0.16	0.5457	0	0	Restored_90s
2022-05-24	13	1	3	1	S1T3Q1	41.8889	-89.3504	Poaceae	Grass_Sedge	C4	40	L	12	Shallow	AT	0.16	0.6804	1	2	Restored_90s
2022-05-24	16	1	3	4	S1T3Q4	41.8894	-89.3504	Poaceae	Grass_Sedge	C4	35	S	36	Deep	BELOW	0.16	3.4491	0	0	Restored_90s
2022-05-24	17	1	3	5	S1T3Q5	41.8895	-89.3504	Poaceae	Grass_Sedge	C4	31	S	27	Moderatly_Deep	LL	0.16	0.7149	0	0	Restored_90s
2022-05-24	18	1	3	6	S1T3Q6	41.8897	-89.3504	Poaceae	Grass_Sedge	C4	70	S	33	Moderatly_Deep	BELOW	0.16	4.5817	0	0	Restored_90s
2022-05-24	19	1	4	1	S1T4Q1	41.8888	-89.3502	Cyperaceae	Grass_Sedge	C4	30	L	9	Very_Shallow	AT	0.16	0.2083	1	3	Restored_90s
2022-05-24	22	1	4	4	S1T4Q4	41.8883	-89.3503	Poaceae	Grass_Sedge	C4	35	LS	33	Moderatly_Deep	BELOW	0.16	1.7526	0	0	Restored_90s
2022-05-24	23	1	4	5	S1T4Q5	41.8881	-89.3504	Poaceae	Grass_Sedge	C4	30	S	34	Moderatly_Deep	BELOW	0.16	1.0628	0	0	Restored_90s
2022-05-24	24	1	4	6	S1T4Q6	41.8879	-89.3504	Poaceae	Grass_Sedge	C4	30	S	36	Deep	BELOW	0.16	0.382	0	0	Restored_90s
2022-05-24	25	1	5	1	S1T5Q1	41.8888	-89.35	Cyperaceae	Grass_Sedge	C4	60	SICL	9	Very_Shallow	AT	0.16	1.2463	1	2	Restored_90s
2022-05-24	28	1	5	4	S1T5Q4	41.8894	-89.35	Poaceae	Grass_Sedge	C4	30	LS	27	Moderatly_Deep	LL	0.16	3.2565	0	0	Restored_90s
2022-05-24	30	1	5	6	S1T5Q6	41.8897	-89.35	Poaceae	Grass_Sedge	C4	38	LS	28	Moderatly_Deep	BELOW	0.16	4.0458	0	0	Restored_90s
2022-05-24	31	1	6	1	S1T6Q1	41.8887	-89.3499	Cyperaceae	Grass_Sedge	C4	65	SICL	9	Very_Shallow	AT	7.44	0.8117	1	3	Restored_90s
2022-05-24	32	1	6	2	S1T6Q2	41.8886	-89.3499	Cyperaceae	Grass_Sedge	C4	70	SIL	9	Very_Shallow	AT	0.16	1.015	0	0	Restored_90s
2022-05-24	33	1	6	3	S1T6Q3	41.8884	-89.35	Cyperaceae	Grass_Sedge	C4	50	SIL	13	Shallow	AT	0.16	0.6379	0	0	Restored_90s
2022-05-24	36	1	6	6	S1T6Q6	41.8879	-89.3502	Poaceae	Grass_Sedge	C4	55	SIL	7	Very_Shallow	AT	0.16	0.8651	0	0	Restored_90s
2022-06-01	40	2	1	4	S2T1Q4	41.8812	-89.3558	Poaceae	Grass_Sedge	C4	60	SL	11	Shallow	AT	0.16	0.2406	0	0	Restored_90s
2022-05-31	43	2	2	1	S2T2Q1	41.8822	-89.356	Cyperaceae	Grass_Sedge	C4	50	SICL	8	Very_Shallow	AT	0.16	3.2791	1	4	Restored_90s
2022-05-31	44	2	2	2	S2T2Q2	41.8823	-89.3561	Poaceae	Grass_Sedge	C4	50	SIL	14	Shallow	AT	0.16	2.801	0	0	Restored_90s
2022-06-01	53	2	3	5	S2T3Q5	41.8809	-89.3555	Poaceae	Grass_Sedge	C4	50	SIL	16	Shallow	AT	0.16	0.3119	0	0	Restored_90s
2022-05-31	55	2	4	1	S2T4Q1	41.8824	-89.3559	Cyperaceae	Grass_Sedge	C4	50	SICL	15	Shallow	AT	0.16	0.5643	1	2	Restored_90s
2022-05-31	56	2	4	2	S2T4Q2	41.8826	-89.3561	Cyperaceae	Grass_Sedge	C4	60	SICL	16	Shallow	AT	0.16	1.1193	0	0	Restored_90s
2022-05-31	58	2	4	4	S2T4Q4	41.8827	-89.3564	Cyperaceae	Grass_Sedge	C4	80	SICL	22	Moderatly_Deep	AT	12.64	0.4862	0	0	Restored_90s
2022-05-31	70	2	6	4	S2T6Q4	41.8829	-89.3563	Poaceae	Grass_Sedge	C4	45	SICL	22	Moderatly_Deep	AT	35.52	0.6587	0	0	Restored_90s
2022-05-26	76	3	1	4	S3T1Q4	41.8822	-89.3595	Poaceae	Grass_Sedge	C4	30	SICL	17	Shallow	AT	56.32	0.8741	0	0	Remnant
2022-05-26	78	3	1	6	S3T1Q6	41.8819	-89.3592	Poaceae	Grass_Sedge	C4	50	O	0	Very_Shallow	AT	8.48	1.6661	1	1	Remnant
2022-05-27	79	3	2	1	S3T2Q1	41.8828	-89.3598	Cyperaceae	Grass_Sedge	C4	60	O	0	Very_Shallow	AT	0.16	0.9543	1	5	Remnant
2022-05-27	80	3	2	2	S3T2Q2	41.8828	-89.3601	Araceae	Grass_Sedge	C3	80	O	0	Very_Shallow	AT	0.16	0.9798	1	2	Remnant
2022-05-27	81	3	2	3	S3T2Q3	41.8829	-89.3603	Araceae	Grass_Sedge	C3	90	O	0	Very_Shallow	AT	0.16	0.498	1	3	Remnant
2022-05-27	82	3	2	4	S3T2Q4	41.8829	-89.3605	Araceae	Grass_Sedge	C3	70	O	0	Very_Shallow	AT	0.16	0.463	1	1	Remnant
2022-05-27	83	3	2	5	S3T2Q5	41.883	-89.3607	Cyperaceae	Grass_Sedge	C4	70	O	0	Very_Shallow	AT	0.16	1.8187	0	0	Remnant
2022-05-27	84	3	2	6	S3T2Q6	41.8831	-89.3609	Cyperaceae	Grass_Sedge	C4	70	O	0	Very_Shallow	AT	0.16	4.9549	0	0	Remnant
2022-05-27	85	3	3	1	S3T3Q1	41.8828	-89.3598	Cyperaceae	Grass_Sedge	C4	70	O	0	Very_Shallow	AT	0.16	0.8783	1	2	Remnant
2022-05-27	86	3	3	2	S3T3Q2	41.8828	-89.3596	Cyperaceae	Grass_Sedge	C4	60	O	0	Very_Shallow	AT	0.16	3.7444	1	3	Remnant
2022-05-27	87	3	3	3	S3T3Q3	41.8827	-89.3594	Poaceae	Grass_Sedge	C4	60	O	0	Very_Shallow	AT	19.92	2.7724	1	1	Remnant
2022-05-27	92	3	4	2	S3T4Q2	41.8831	-89.3599	Cyperaceae	Grass_Sedge	C4	70	O	0	Very_Shallow	AT	0.16	0.8303	1	3	Remnant
2022-05-27	93	3	4	3	S3T4Q3	41.8833	-89.3602	Araceae	Grass_Sedge	C3	100	O	0	Very_Shallow	AT	1.2	0.0629	1	1	Remnant
2022-05-27	94	3	4	4	S3T4Q4	41.8833	-89.3604	Araceae	Grass_Sedge	C3	100	O	0	Very_Shallow	AT	0.16	5.6342	1	2	Remnant
2022-05-27	95	3	4	5	S3T4Q5	41.8834	-89.3606	Typhaceae	Grass_Sedge	C3	90	O	0	Very_Shallow	AT	8.48	2.1458	1	4	Remnant
2022-05-27	96	3	4	6	S3T4Q6	41.8834	-89.3608	Araceae	Grass_Sedge	C3	90	O	0	Very_Shallow	AT	32.4	1.4997	1	6	Remnant
2022-05-27	97	3	5	1	S3T5Q1	41.8831	-89.3396	Cyperaceae	Grass_Sedge	C4	70	O	0	Very_Shallow	AT	0.16	3.1286	1	10	Remnant
2022-05-27	100	3	5	4	S3T5Q4	41.8828	-89.3591	Poaceae	Grass_Sedge	C4	30	SICL	21	Moderatly_Deep	AT	16.8	1.3271	1	2	Remnant
2022-05-27	102	3	5	6	S3T5Q6	41.8825	-89.3588	Cyperaceae	Grass_Sedge	C4	25	SIL	15	Shallow	BELOW	77.12	0.9658	0	0	Remnant
2022-05-27	105	3	6	3	S3T6Q3	41.8835	-89.3598	Poaceae	Grass_Sedge	C4	80	O	0	Very_Shallow	AT	56.32	1.755	0	0	Remnant
2022-05-25	112	4	1	4	S4T1Q4	41.8939	-89.3261	Poaceae	Grass_Sedge	C4	40	LS	20	Moderatly_Deep	BELOW	69.84	0.0292	0	0	Restored_10s
2022-05-25	115	4	2	1	S4T2Q1	41.8932	-89.326	Poaceae	Grass_Sedge	C4	70	SICL	23	Moderatly_Deep	BELOW	46.96	0.0094	1	1	Restored_10s
2022-05-25	118	4	2	4	S4T2Q4	41.8927	-89.3258	Poaceae	Grass_Sedge	C4	80	SL	20	Moderatly_Deep	AT	39.68	0.075	1	1	Restored_10s
2022-05-25	119	4	2	5	S4T2Q5	41.8926	-89.3258	Poaceae	Grass_Sedge	C4	90	SL	38	Deep	BELOW	88.56	0.1367	0	0	Restored_10s
2022-05-25	120	4	2	6	S4T2Q6	41.8922	-89.3256	Poaceae	Grass_Sedge	C4	90	SIL	21	Moderatly_Deep	AT	11.6	0.3072	0	0	Restored_10s
2022-05-25	125	4	3	5	S4T3Q5	41.8939	-89.3257	Poaceae	Grass_Sedge	C4	35	SICL	31	Moderatly_Deep	AT	22	0.0084	0	0	Restored_10s
2022-05-25	127	5	1	1	S5T1Q1	41.9017	-89.3424	Poaceae	Grass_Sedge	C4	85	SIL	10	Very_Shallow	AT	0.16	0.436	0	0	Restored_10s
2022-05-25	132	5	2	1	S5T2Q1	41.9016	-89.3423	Poaceae	Grass_Sedge	C4	80	SIL	14	Shallow	LL	0.16	0.9062	0	0	Restored_10s
2022-05-25	133	5	2	2	S5T2Q2	41.9016	-89.3421	Poaceae	Grass_Sedge	C4	70	SICL	23	Moderatly_Deep	AT	0.16	0.2087	0	0	Restored_10s
2022-05-25	134	5	2	3	S5T2Q3	41.9016	-89.3419	Poaceae	Grass_Sedge	C4	60	SICL	24	Moderatly_Deep	LL	0.16	1.7822	0	0	Restored_10s
2022-05-25	142	5	4	1	S5T4Q1	41.9013	-89.3423	Poaceae	Grass_Sedge	C4	40	SIL	23	Moderatly_Deep	AT	0.16	5.3082	0	0	Restored_10s
2022-05-25	143	5	4	2	S5T4Q2	41.9014	-89.3421	Poaceae	Grass_Sedge	C4	50	SICL	13	Shallow	AT	0.16	0.7145	0	0	Restored_10s
2022-05-25	147	5	5	1	S5T5Q1	41.9012	-89.3423	Poaceae	Grass_Sedge	C4	50	SIL	5	Very_Shallow	AT	0.16	1.222	0	0	Restored_10s
2022-05-25	148	5	5	2	S5T5Q2	41.9012	-89.3425	Poaceae	Grass_Sedge	C4	75	SICL	9	Very_Shallow	AT	0.16	3.2476	0	0	Restored_10s
2022-05-25	149	5	5	3	S5T5Q3	41.9012	-89.3428	Poaceae	Grass_Sedge	C4	65	SIL	9	Very_Shallow	AT	0.16	0.3506	0	0	Restored_10s
2022-05-25	152	5	6	1	S5T6Q1	41.9011	-89.3422	Poaceae	Grass_Sedge	C4	60	SICL	5	Very_Shallow	AT	0.16	0.5507	0	0	Restored_10s
2022-05-25	153	5	6	2	S5T6Q2	41.901	-89.342	Poaceae	Grass_Sedge	C4	65	L	14	Shallow	AT	0.16	0.3621	0	0	Restored_10s
2022-05-25	154	5	6	3	S5T6Q3	41.901	-89.3418	Poaceae	Grass_Sedge	C4	80	SICL	9	Very_Shallow	AT	0.16	1.0508	0	0	Restored_10s
2022-05-25	155	5	6	4	S5T6Q4	41.901	-89.3415	Poaceae	Grass_Sedge	C4	70	SICL	15	Shallow	AT	0.16	1.773	0	0	Restored_10s
2022-06-02	157	6	1	1	S6T1Q1	41.8927	-89.3774	Cyperaceae	Grass_Sedge	C4	55	SIL	1	Very_Shallow	AT	7.44	3.4396	1	1	Remnant
2022-06-02	162	6	1	6	S6T1Q6	41.8932	-89.3764	Poaceae	Grass_Sedge	C4	60	SL	9	Very_Shallow	AT	0.16	1.1911	0	0	Remnant
2022-06-02	163	6	2	1	S6T2Q1	41.8928	-89.3775	Poaceae	Grass_Sedge	C4	65	SIL	5	Very_Shallow	AT	0.16	2.4117	0	0	Remnant
2022-06-02	168	6	2	6	S6T2Q6	41.8922	-89.3784	Cyperaceae	Grass_Sedge	C4	65	SL	7	Very_Shallow	AT	0.16	0.7373	0	0	Remnant
2022-06-02	170	6	3	2	S6T3Q2	41.893	-89.3773	Poaceae	Grass_Sedge	C4	50	SIL	1	Very_Shallow	AT	0.16	0.6668	0	0	Remnant
2022-06-02	172	6	3	4	S6T3Q4	41.8932	-89.3769	Cyperaceae	Grass_Sedge	C4	45	SL	7	Very_Shallow	AT	7.44	3.5138	0	0	Remnant
2022-06-02	176	6	4	2	S6T4Q2	41.8934	-89.3778	Typhaceae	Grass_Sedge	C3	40	L	5	Very_Shallow	AT	0.16	0.0006	0	0	Remnant
2022-06-02	177	6	4	3	S6T4Q3	41.8935	-89.3777	Cyperaceae	Grass_Sedge	C4	35	SIL	6	Very_Shallow	AT	0.16	0.1949	0	0	Remnant
2022-06-02	180	6	4	6	S6T4Q6	41.8939	-89.3772	Cyperaceae	Grass_Sedge	C4	50	SL	12	Shallow	AT	41.76	0.9354	0	0	Remnant
2022-06-02	181	6	5	1	S6T5Q1	41.8933	-89.3782	Cyperaceae	Grass_Sedge	C4	65	SIL	5	Very_Shallow	AT	0.16	2.6195	1	3	Remnant
2022-06-02	182	6	5	2	S6T5Q2	41.8932	-89.3784	Cyperaceae	Grass_Sedge	C4	25	SICL	28	Moderatly_Deep	AT	0.16	3.2487	0	0	Remnant
2022-06-02	183	6	5	3	S6T5Q3	41.893	-89.3785	Cyperaceae	Grass_Sedge	C4	30	SICL	8	Very_Shallow	AT	12.64	3.1819	1	1	Remnant
2022-06-02	184	6	5	4	S6T5Q4	41.8929	-89.3787	Cyperaceae	Grass_Sedge	C4	40	SIL	5	Very_Shallow	AT	0.16	1.1596	1	3	Remnant
2022-06-02	190	6	6	4	S6T6Q4	41.8931	-89.3789	Cyperaceae	Grass_Sedge	C4	45	SIL	16	Shallow	AT	39.68	3.9121	0	0	Remnant

## Sheet: Sheet2
Date	order	site	Transect	Quadrate	Site_code	Lattitude	Longitude	domveg	functional_group	phototype	vegcov	soil	wattab	Water_Table	wtreach	canopen	canopy	biomass	presence	burrows	Restor_stat
2022-05-23	1	1	1	1	S1T1Q1	41.8889	-89.3508	Poaceae	Warm_Graminoids	C4	67	SICL	9	Very_Shallow	AT	0	0.16	1.3779	0	0	Restored_90s
2022-05-23	2	1	1	2	S1T1Q2	41.889	-89.3508	Cyperaceae	Warm_Graminoids	C4	47	SIL	12	Shallow	AT	0	0.16	0.5599	1	1	Restored_90s
2022-05-23	3	1	1	3	S1T1Q3	41.8893	-89.3507	Cyperaceae	Warm_Graminoids	C4	80	SIL	16	Shallow	AT	0	0.16	0.3054	0	0	Restored_90s
2022-05-23	4	1	1	4	S1T1Q4	41.8895	-89.3501	Poaceae	Warm_Graminoids	C4	60	SIL	22	Moderatly_Deep	AT	0	0.16	0.0964	1	1	Restored_90s
2022-05-23	5	1	1	5	S1T1Q5	41.8896	-89.3507	Poaceae	Warm_Graminoids	C4	88	SIL	16	Shallow	AT	0	0.16	1.3358	0	0	Restored_90s
2022-05-23	6	1	1	6	S1T1Q6	41.8898	-89.3507	Poaceae	Warm_Graminoids	C4	90	SIL	18	Shallow	AT	0	0.16	0.5929	0	0	Restored_90s
2022-05-23	7	1	2	1	S1T2Q1	41.8889	-89.3506	Poaceae	Warm_Graminoids	C4	50	SIL	9	Very_Shallow	AT	0	0.16	2.6956	0	0	Restored_90s
2022-05-23	8	1	2	2	S1T2Q2	41.8887	-89.3506	Asteraceae	Sum_Fall_Forbs	C4	50	SIL	15	Shallow	AT	0	0.16	0.8989	0	0	Restored_90s
2022-05-23	9	1	2	3	S1T2Q3	41.8885	-89.3506	Poaceae	Warm_Graminoids	C4	40	SIL	40	Deep	BELOW	0	0.16	0.848	0	0	Restored_90s
2022-05-24	10	1	2	4	S1T2Q4	41.8884	-89.3506	Poaceae	Warm_Graminoids	C4	30	SIL	31	Moderatly_Deep	BELOW	0	0.16	0.7079	0	0	Restored_90s
2022-05-24	11	1	2	5	S1T2Q5	41.8882	-89.3507	Poaceae	Warm_Graminoids	C4	30	L	35	Moderatly_Deep	BELOW	0	0.16	0.6686	0	0	Restored_90s
2022-05-24	12	1	2	6	S1T2Q6	41.888	-89.3507	Poaceae	Warm_Graminoids	C4	40	S	36	Deep	BELOW	0	0.16	0.5457	0	0	Restored_90s
2022-05-24	13	1	3	1	S1T3Q1	41.8889	-89.3504	Poaceae	Warm_Graminoids	C4	40	L	12	Shallow	AT	0	0.16	0.6804	1	2	Restored_90s
2022-05-24	14	1	3	2	S1T3Q2	41.889	-89.3504	Asteraceae	Sum_Fall_Forbs	C4	60	L	14	Shallow	AT	0	0.16	1.1837	1	2	Restored_90s
2022-05-24	15	1	3	3	S1T3Q3	41.8892	-89.3504	Asteraceae	Sum_Fall_Forbs	C4	70	LS	42	Deep	BELOW	0	0.16	0.8053	0	0	Restored_90s
2022-05-24	16	1	3	4	S1T3Q4	41.8894	-89.3504	Poaceae	Warm_Graminoids	C4	35	S	36	Deep	BELOW	0	0.16	3.4491	0	0	Restored_90s
2022-05-24	17	1	3	5	S1T3Q5	41.8895	-89.3504	Poaceae	Warm_Graminoids	C4	31	S	27	Moderatly_Deep	LL	0	0.16	0.7149	0	0	Restored_90s
2022-05-24	18	1	3	6	S1T3Q6	41.8897	-89.3504	Poaceae	Warm_Graminoids	C4	70	S	33	Moderatly_Deep	BELOW	0	0.16	4.5817	0	0	Restored_90s
2022-05-24	19	1	4	1	S1T4Q1	41.8888	-89.3502	Cyperaceae	Warm_Graminoids	C4	30	L	9	Very_Shallow	AT	0	0.16	0.2083	1	3	Restored_90s
2022-05-24	20	1	4	2	S1T4Q2	41.8886	89.3502	Rosaceae	Woody_Shrub	C3	60	SIL	19	Shallow	AT	0	0.16	1.0974	0	0	Restored_90s
2022-05-24	21	1	4	3	S1T4Q3	41.8884	-89.3503	Asteraceae	Sum_Fall_Forbs	C4	40	SL	26	Moderatly_Deep	AT	0	0.16	2.9726	0	0	Restored_90s
2022-05-24	22	1	4	4	S1T4Q4	41.8883	-89.3503	Poaceae	Warm_Graminoids	C4	35	LS	33	Moderatly_Deep	BELOW	0	0.16	1.7526	0	0	Restored_90s
2022-05-24	23	1	4	5	S1T4Q5	41.8881	-89.3504	Poaceae	Warm_Graminoids	C4	30	S	34	Moderatly_Deep	BELOW	0	0.16	1.0628	0	0	Restored_90s
2022-05-24	24	1	4	6	S1T4Q6	41.8879	-89.3504	Poaceae	Warm_Graminoids	C4	30	S	36	Deep	BELOW	0	0.16	0.382	0	0	Restored_90s
2022-05-24	25	1	5	1	S1T5Q1	41.8888	-89.35	Cyperaceae	Warm_Graminoids	C4	60	SICL	9	Very_Shallow	AT	0	0.16	1.2463	1	2	Restored_90s
2022-05-24	26	1	5	2	S1T5Q2	41.889	-89.35	Asteraceae	Sum_Fall_Forbs	C4	35	SIL	18	Shallow	AT	0	0.16	0.712	0	0	Restored_90s
2022-05-24	27	1	5	3	S1T5Q3	41.8892	-89.35	Caryophyllaceae	AB_Forbs	C3	40	S	30	Moderatly_Deep	AT	0	0.16	4.182	0	0	Restored_90s
2022-05-24	28	1	5	4	S1T5Q4	41.8894	-89.35	Poaceae	Warm_Graminoids	C4	30	LS	27	Moderatly_Deep	LL	0	0.16	3.2565	0	0	Restored_90s
2022-05-24	29	1	5	5	S1T5Q5	41.8895	-89.35	Asteraceae	Sum_Fall_Forbs	C4	30	S	20	Moderatly_Deep	LL	0	0.16	1.7914	0	0	Restored_90s
2022-05-24	30	1	5	6	S1T5Q6	41.8897	-89.35	Poaceae	Warm_Graminoids	C4	38	LS	28	Moderatly_Deep	BELOW	0	0.16	4.0458	0	0	Restored_90s
2022-05-24	31	1	6	1	S1T6Q1	41.8887	-89.3499	Cyperaceae	Warm_Graminoids	C4	65	SICL	9	Very_Shallow	AT	7	7.44	0.8117	1	3	Restored_90s
2022-05-24	32	1	6	2	S1T6Q2	41.8886	-89.3499	Cyperaceae	Warm_Graminoids	C4	70	SIL	9	Very_Shallow	AT	0	0.16	1.015	0	0	Restored_90s
2022-05-24	33	1	6	3	S1T6Q3	41.8884	-89.35	Cyperaceae	Warm_Graminoids	C4	50	SIL	13	Shallow	AT	0	0.16	0.6379	0	0	Restored_90s
2022-05-24	34	1	6	4	S1T6Q4	41.8882	-89.35	Asteraceae	Sum_Fall_Forbs	C4	60	SIL	16	Shallow	AT	0	0.16	0.9764	1	4	Restored_90s
2022-05-24	35	1	6	5	S1T6Q5	41.888	-89.3501	Asteraceae	Sum_Fall_Forbs	C4	60	SIL	8	Very_Shallow	AT	0	0.16	1.6265	1	2	Restored_90s
2022-05-24	36	1	6	6	S1T6Q6	41.8879	-89.3502	Poaceae	Warm_Graminoids	C4	55	SIL	7	Very_Shallow	AT	0	0.16	0.8651	0	0	Restored_90s
2022-06-01	37	2	1	1	S2T1Q1	41.8817	-89.3557	Fabaceae	Legumes	C3	45	SIL	9	Very_Shallow	AT	0	0.16	0.1219	0	0	Restored_90s
2022-06-01	38	2	1	2	S2T1Q2	41.8815	-89.3557	Fabaceae	Legumes	C3	55	SICL	8	Very_Shallow	AT	0	0.16	0.4971	0	0	Restored_90s
2022-06-01	39	2	1	3	S2T1Q3	41.8813	-89.3558	Fabaceae	Legumes	C3	20	SICL	6	Very_Shallow	AT	0	0.16	0.5061	0	0	Restored_90s
2022-06-01	40	2	1	4	S2T1Q4	41.8812	-89.3558	Poaceae	Warm_Graminoids	C4	60	SL	11	Shallow	AT	0	0.16	0.2406	0	0	Restored_90s
2022-06-01	41	2	1	5	S2T1Q5	41.881	-89.3558	Asteraceae	Sum_Fall_Forbs	C4	55	SL	16	Shallow	AT	0	0.16	0.6931	0	0	Restored_90s
2022-06-01	42	2	1	6	S2T1Q6	41.8808	-89.3558	Asteraceae	Sum_Fall_Forbs	C4	45	SICL	23	Moderatly_Deep	AT	0	0.16	0.7201	0	0	Restored_90s
2022-05-31	43	2	2	1	S2T2Q1	41.8822	-89.356	Cyperaceae	Warm_Graminoids	C4	50	SICL	8	Very_Shallow	AT	0	0.16	3.2791	1	4	Restored_90s
2022-05-31	44	2	2	2	S2T2Q2	41.8823	-89.3561	Poaceae	Warm_Graminoids	C4	50	SIL	14	Shallow	AT	0	0.16	2.801	0	0	Restored_90s
2022-05-31	45	2	2	3	S2T2Q3	41.8824	-89.3564	Asteraceae	Sum_Fall_Forbs	C4	60	SICL	11	Shallow	AT	0	0.16	0.5832	0	0	Restored_90s
2022-05-31	46	2	2	4	S2T2Q4	41.8826	-89.3566	Asteraceae	Sum_Fall_Forbs	C4	30	SICL	18	Shallow	AT	62	64.64	0.6095	0	0	Restored_90s
2022-05-31	47	2	2	5	S2T2Q5	41.8827	-89.3567	Rosaceae	Woody_Shrub	C3	40	LS	36	Deep	AT	93	96.88	0.482	0	0	Restored_90s
2022-05-31	48	2	2	6	S2T2Q6	41.8828	-89.3569	Rosaceae	Woody_Shrub	C3	40	CL	26	Moderatly_Deep	AT	0	0.16	0.6716	0	0	Restored_90s
2022-06-01	49	2	3	1	S2T3Q1	41.8816	-89.3556	Asteraceae	Sum_Fall_Forbs	C4	70	SICL	8	Very_Shallow	AT	0	0.16	0.7238	0	0	Restored_90s
2022-06-01	50	2	3	2	S2T3Q2	41.8814	-89.3555	Asteraceae	Sum_Fall_Forbs	C4	60	SIL	9	Very_Shallow	AT	0	0.16	0.94	0	0	Restored_90s
2022-06-01	51	2	3	3	S2T3Q3	41.8812	-89.3555	Asteraceae	Sum_Fall_Forbs	C4	60	SIL	11	Shallow	AT	0	0.16	0.5987	0	0	Restored_90s
2022-06-01	52	2	3	4	S2T3Q4	41.8811	-89.3555	Asteraceae	Sum_Fall_Forbs	C4	55	SCL	10	Very_Shallow	AT	0	0.16	0.1757	0	0	Restored_90s
2022-06-01	53	2	3	5	S2T3Q5	41.8809	-89.3555	Poaceae	Warm_Graminoids	C4	50	SIL	16	Shallow	AT	0	0.16	0.3119	0	0	Restored_90s
2022-06-01	54	2	3	6	S2T3Q6	41.8807	-89.3556	Asteraceae	Sum_Fall_Forbs	C4	35	SICL	12	Shallow	AT	0	0.16	0.2813	0	0	Restored_90s
2022-05-31	55	2	4	1	S2T4Q1	41.8824	-89.3559	Cyperaceae	Warm_Graminoids	C4	50	SICL	15	Shallow	AT	0	0.16	0.5643	1	2	Restored_90s
2022-05-31	56	2	4	2	S2T4Q2	41.8826	-89.3561	Cyperaceae	Warm_Graminoids	C4	60	SICL	16	Shallow	AT	0	0.16	1.1193	0	0	Restored_90s
2022-05-31	57	2	4	3	S2T4Q3	41.8826	-89.3563	Asteraceae	Sum_Fall_Forbs	C4	40	SICL	12	Shallow	AT	6	6.4	0.5602	0	0	Restored_90s
2022-05-31	58	2	4	4	S2T4Q4	41.8827	-89.3564	Cyperaceae	Warm_Graminoids	C4	80	SICL	22	Moderatly_Deep	AT	12	12.64	0.4862	0	0	Restored_90s
2022-05-31	59	2	4	5	S2T4Q5	41.8828	-89.3566	Asteraceae	Sum_Fall_Forbs	C4	35	SIL	13	Shallow	AT	70	72.96	1.0229	0	0	Restored_90s
2022-05-31	60	2	4	6	S2T4Q6	41.8829	-89.3568	Rosaceae	Woody_Shrub	C3	38	SCL	14	Shallow	AT	65	67.76	5.2879	0	0	Restored_90s
2022-06-01	61	2	5	1	S2T5Q1	41.5814	-89.3552	Asteraceae	Sum_Fall_Forbs	C4	60	SIL	8	Very_Shallow	AT	0	0.16	0.9831	0	0	Restored_90s
2022-06-01	62	2	5	2	S2T5Q2	41.8813	-89.3553	Asteraceae	Sum_Fall_Forbs	C4	70	SIL	10	Very_Shallow	AT	0	0.16	0.5197	0	0	Restored_90s
2022-06-01	63	2	5	3	S2T5Q3	41.8811	-89.3553	Asteraceae	Sum_Fall_Forbs	C4	70	SIL	11	Shallow	AT	0	0.16	0.3845	0	0	Restored_90s
2022-06-01	64	2	5	4	S2T5Q4	41.8809	-89.3553	Asteraceae	Spring_Forbs	C4	45	SICL	8	Very_Shallow	AT	0	0.16	0.5794	0	0	Restored_90s
2022-06-01	65	2	5	5	S2T5Q5	41.8807	-89.3553	Asteraceae	Spring_Forbs	C4	75	SICL	8	Very_Shallow	AT	0	0.16	0.2673	0	0	Restored_90s
2022-06-01	66	2	5	6	S2T5Q6	41.8805	-89.3553	Asteraceae	Spring_Forbs	C4	55	SICL	19	Shallow	AT	0	0.16	0.2403	0	0	Restored_90s
2022-05-31	67	2	6	1	S2T6Q1	41.8826	-89.3557	Asteraceae	Sum_Fall_Forbs	C4	55	SICL	12	Shallow	AT	0	0.16	1.8453	1	4	Restored_90s
2022-05-31	68	2	6	2	S2T6Q2	41.8827	-89.3559	Asteraceae	Sum_Fall_Forbs	C4	55	SICL	12	Shallow	AT	0	0.16	0.7202	0	0	Restored_90s
2022-05-31	69	2	6	3	S2T6Q3	41.8828	-89.3561	Asteraceae	Sum_Fall_Forbs	C4	45	SICL	8	Very_Shallow	AT	0	0.16	0.4047	0	0	Restored_90s
2022-05-31	70	2	6	4	S2T6Q4	41.8829	-89.3563	Poaceae	Warm_Graminoids	C4	45	SICL	22	Moderatly_Deep	AT	34	35.52	0.6587	0	0	Restored_90s
2022-05-31	71	2	6	5	S2T6Q5	41.883	-89.3565	Asteraceae	Sum_Fall_Forbs	C4	30	SL	8	Very_Shallow	AT	27	28.24	0.5882	0	0	Restored_90s
2022-05-31	72	2	6	6	S2T6Q6	41.8831	-89.3567	Asteraceae	Sum_Fall_Forbs	C4	41	SCL	27	Moderatly_Deep	AT	62	64.64	0.3924	0	0	Restored_90s
2022-05-26	73	3	1	1	S3T1Q1	41.8826	-89.36	Asteraceae	Sum_Fall_Forbs	C4	75	O	0	Very_Shallow	AT	0	0.16	2.4145	1	1	Remnant
2022-05-26	74	3	1	2	S3T1Q2	41.8825	-89.3598	Asteraceae	Sum_Fall_Forbs	C4	60	O	0	Very_Shallow	AT	0	0.16	1.7586	0	0	Remnant
2022-05-26	75	3	1	3	S3T1Q3	41.8823	-89.3596	Asteraceae	Sum_Fall_Forbs	C4	65	O	0	Very_Shallow	AT	16	16.8	1.4172	0	0	Remnant
2022-05-26	76	3	1	4	S3T1Q4	41.8822	-89.3595	Poaceae	Warm_Graminoids	C4	30	SICL	17	Shallow	AT	54	56.32	0.8741	0	0	Remnant
2022-05-26	77	3	1	5	S3T1Q5	41.8821	-89.3593	Rosaceae	Woody_Shrub	C3	40	SL	16	Shallow	LL	58	60.48	0.512	0	0	Remnant
2022-05-26	78	3	1	6	S3T1Q6	41.8819	-89.3592	Poaceae	Warm_Graminoids	C4	50	O	0	Very_Shallow	AT	8	8.48	1.6661	1	1	Remnant
2022-05-27	79	3	2	1	S3T2Q1	41.8828	-89.3598	Cyperaceae	Warm_Graminoids	C4	60	O	0	Very_Shallow	AT	0	0.16	0.9543	1	5	Remnant
2022-05-27	80	3	2	2	S3T2Q2	41.8828	-89.3601	Araceae	Cool_Graminoids	C3	80	O	0	Very_Shallow	AT	0	0.16	0.9798	1	2	Remnant
2022-05-27	81	3	2	3	S3T2Q3	41.8829	-89.3603	Araceae	Cool_Graminoids	C3	90	O	0	Very_Shallow	AT	0	0.16	0.498	1	3	Remnant
2022-05-27	82	3	2	4	S3T2Q4	41.8829	-89.3605	Araceae	Cool_Graminoids	C3	70	O	0	Very_Shallow	AT	0	0.16	0.463	1	1	Remnant
2022-05-27	83	3	2	5	S3T2Q5	41.883	-89.3607	Cyperaceae	Warm_Graminoids	C4	70	O	0	Very_Shallow	AT	0	0.16	1.8187	0	0	Remnant
2022-05-27	84	3	2	6	S3T2Q6	41.8831	-89.3609	Cyperaceae	Warm_Graminoids	C4	70	O	0	Very_Shallow	AT	0	0.16	4.9549	0	0	Remnant
2022-05-27	85	3	3	1	S3T3Q1	41.8828	-89.3598	Cyperaceae	Warm_Graminoids	C4	70	O	0	Very_Shallow	AT	0	0.16	0.8783	1	2	Remnant
2022-05-27	86	3	3	2	S3T3Q2	41.8828	-89.3596	Cyperaceae	Warm_Graminoids	C4	60	O	0	Very_Shallow	AT	0	0.16	3.7444	1	3	Remnant
2022-05-27	87	3	3	3	S3T3Q3	41.8827	-89.3594	Poaceae	Warm_Graminoids	C4	60	O	0	Very_Shallow	AT	19	19.92	2.7724	1	1	Remnant
2022-05-27	88	3	3	4	S3T3Q4	41.8825	-89.3593	Plantaginaceae	AB_Forbs	C3	30	SICL	14	Shallow	AT	88	91.68	1.165	0	0	Remnant
2022-05-27	89	3	3	5	S3T3Q5	41.8824	-89.3591	Vitaceae	Spring_Forbs	C3	30	SIL	15	Shallow	BELOW	94	97.92	1.4978	0	0	Remnant
2022-05-27	90	3	3	6	S3T3Q6	41.8823	-89.3589	Rosaceae	Woody_Shrub	C3	25	SICL	18	Shallow	AT	94	97.92	1.0978	0	0	Remnant
2022-05-27	91	3	4	1	S3T4Q1	41.883	-89.3597	Asteraceae	Sum_Fall_Forbs	C4	50	O	0	Very_Shallow	AT	0	0.16	0.8767	1	4	Remnant
2022-05-27	92	3	4	2	S3T4Q2	41.8831	-89.3599	Cyperaceae	Warm_Graminoids	C4	70	O	0	Very_Shallow	AT	0	0.16	0.8303	1	3	Remnant
2022-05-27	93	3	4	3	S3T4Q3	41.8833	-89.3602	Araceae	Cool_Graminoids	C3	100	O	0	Very_Shallow	AT	1	1.2	0.0629	1	1	Remnant
2022-05-27	94	3	4	4	S3T4Q4	41.8833	-89.3604	Araceae	Cool_Graminoids	C3	100	O	0	Very_Shallow	AT	0	0.16	5.6342	1	2	Remnant
2022-05-27	95	3	4	5	S3T4Q5	41.8834	-89.3606	Typhaceae	Cool_Graminoids	C3	90	O	0	Very_Shallow	AT	8	8.48	2.1458	1	4	Remnant
2022-05-27	96	3	4	6	S3T4Q6	41.8834	-89.3608	Araceae	Cool_Graminoids	C3	90	O	0	Very_Shallow	AT	31	32.4	1.4997	1	6	Remnant
2022-05-27	97	3	5	1	S3T5Q1	41.8831	-89.3396	Cyperaceae	Warm_Graminoids	C4	70	O	0	Very_Shallow	AT	0	0.16	3.1286	1	10	Remnant
2022-05-27	98	3	5	2	S3T5Q2	41.883	-89.3594	Plantaginaceae	AB_Forbs	C3	70	O	0	Very_Shallow	AT	0	0.16	3.3967	1	14	Remnant
2022-05-27	99	3	5	3	S3T5Q3	41.8829	-89.3593	Plantaginaceae	AB_Forbs	C3	35	O	0	Very_Shallow	AT	0	0.16	4.1098	1	1	Remnant
2022-05-27	100	3	5	4	S3T5Q4	41.8828	-89.3591	Poaceae	Warm_Graminoids	C4	30	SICL	21	Moderatly_Deep	AT	16	16.8	1.3271	1	2	Remnant
2022-05-27	101	3	5	5	S3T5Q5	41.8827	-89.3529	Rosaceae	Woody_Shrub	C3	40	SICL	20	Moderatly_Deep	AT	65	67.76	0.3463	0	0	Remnant
2022-05-27	102	3	5	6	S3T5Q6	41.8825	-89.3588	Cyperaceae	Warm_Graminoids	C4	25	SIL	15	Shallow	BELOW	74	77.12	0.9658	0	0	Remnant
2022-05-27	103	3	6	1	S3T6Q1	41.8833	-89.3595	Asteraceae	Sum_Fall_Forbs	C4	75	O	0	Very_Shallow	AT	0	0.16	2.9013	1	17	Remnant
2022-05-27	104	3	6	2	S3T6Q2	41.8834	-89.3597	Asteraceae	Sum_Fall_Forbs	C4	80	O	0	Very_Shallow	AT	0	0.16	8.1968	1	6	Remnant
2022-05-27	105	3	6	3	S3T6Q3	41.8835	-89.3598	Poaceae	Warm_Graminoids	C4	80	O	0	Very_Shallow	AT	54	56.32	1.755	0	0	Remnant
2022-05-27	106	3	6	4	S3T6Q4	41.8836	-89.36	Asteraceae	Sum_Fall_Forbs	C4	30	LS	13	Shallow	LL	58	60.48	0.4179	0	0	Remnant
2022-05-27	107	3	6	5	S3T6Q5	41.8837	-89.3602	Rosaceae	Woody_Shrub	C3	30	LS	12	Shallow	LL	46	48	0.7074	0	0	Remnant
2022-05-27	108	3	6	6	S3T6Q6	41.8839	-89.3603	Asteraceae	Sum_Fall_Forbs	C4	40	SL	28	Moderatly_Deep	LL	37	38.64	0.4271	0	0	Remnant
2022-05-25	109	4	1	1	S4T1Q1	41.8933	-89.3261	Apiaceae	Sum_Fall_Forbs	C3	55	SIL	9	Very_Shallow	AT	12	12.64	0.0858	1	3	Restored_10s
2022-05-25	110	4	1	2	S4T1Q2	41.8935	-89.3261	Asteraceae	Sum_Fall_Forbs	C4	30	SIL	10	Very_Shallow	AT	0	0.16	0.0297	0	0	Restored_10s
2022-05-25	111	4	1	3	S4T1Q3	41.8937	-89.3261	Asteraceae	Sum_Fall_Forbs	C4	30	SIL	8	Very_Shallow	AT	0	0.16	0.0334	0	0	Restored_10s
2022-05-25	112	4	1	4	S4T1Q4	41.8939	-89.3261	Poaceae	Warm_Graminoids	C4	40	LS	20	Moderatly_Deep	BELOW	67	69.84	0.0292	0	0	Restored_10s
2022-05-25	113	4	1	5	S4T1Q5	41.894	-89.3261	Violaceae	Ephem_Spring_Forbs	C3	40	LS	32	Moderatly_Deep	BELOW	100	104.16	0.7793	0	0	Restored_10s
2022-05-25	114	4	1	6	S4T1Q6	41.8942	-89.3261	Violaceae	Ephem_Spring_Forbs	C3	10	SIL	7	Very_Shallow	LL	85	88.56	0.0623	0	0	Restored_10s
2022-05-25	115	4	2	1	S4T2Q1	41.8932	-89.326	Poaceae	Warm_Graminoids	C4	70	SICL	23	Moderatly_Deep	BELOW	45	46.96	0.0094	1	1	Restored_10s
2022-05-25	116	4	2	2	S4T2Q2	41.893	-89.326	Violaceae	Ephem_Spring_Forbs	C3	70	SICL	17	Shallow	AT	76	79.2	0.8425	0	0	Restored_10s
2022-05-25	117	4	2	3	S4T2Q3	41.8929	-89.326	Violaceae	Ephem_Spring_Forbs	C3	85	SL	28	Moderatly_Deep	BELOW	89	92.72	0.5802	0	0	Restored_10s
2022-05-25	118	4	2	4	S4T2Q4	41.8927	-89.3258	Poaceae	Warm_Graminoids	C4	80	SL	20	Moderatly_Deep	AT	38	39.68	0.075	1	1	Restored_10s
2022-05-25	119	4	2	5	S4T2Q5	41.8926	-89.3258	Poaceae	Warm_Graminoids	C4	90	SL	38	Deep	BELOW	85	88.56	0.1367	0	0	Restored_10s
2022-05-25	120	4	2	6	S4T2Q6	41.8922	-89.3256	Poaceae	Warm_Graminoids	C4	90	SIL	21	Moderatly_Deep	AT	11	11.6	0.3072	0	0	Restored_10s
2022-05-25	121	4	3	1	S4T3Q1	41.8932	-89.326	Asteraceae	Sum_Fall_Forbs	C4	35	SICL	12	Shallow	BELOW	42	43.84	0.4055	1	2	Restored_10s
2022-05-25	122	4	3	2	S4T3Q2	41.8934	-89.3258	Asteraceae	Sum_Fall_Forbs	C4	20	SICL	16	Shallow	AT	0	0.16	0.0844	0	0	Restored_10s
2022-05-25	123	4	3	3	S4T3Q3	41.8935	-89.3258	Asteraceae	Sum_Fall_Forbs	C4	60	SICL	30	Moderatly_Deep	BELOW	0	0.16	0.0103	0	0	Restored_10s
2022-05-25	124	4	3	4	S4T3Q4	41.8937	-89.3257	Polygonaceae	AB_Forbs	C4	25	SICL	11	Shallow	AT	0	0.16	0.3582	0	0	Restored_10s
2022-05-25	125	4	3	5	S4T3Q5	41.8939	-89.3257	Poaceae	Warm_Graminoids	C4	35	SICL	31	Moderatly_Deep	AT	21	22	0.0084	0	0	Restored_10s
2022-05-25	126	4	3	6	S4T3Q6	41.8941	-89.3256	Rosaceae	Woody_Shrub	C3	25	SICL	21	Moderatly_Deep	AT	12	12.64	0.0273	0	0	Restored_10s
2022-05-25	127	5	1	1	S5T1Q1	41.9017	-89.3424	Poaceae	Warm_Graminoids	C4	85	SIL	10	Very_Shallow	AT	0	0.16	0.436	0	0	Restored_10s
2022-05-25	128	5	1	2	S5T1Q2	41.9017	-89.3426	Asteraceae	Sum_Fall_Forbs	C4	80	SICL	27	Moderatly_Deep	BELOW	0	0.16	0.0607	0	0	Restored_10s
2022-05-25	129	5	1	3	S5T1Q3	41.9017	-89.3429	Asteraceae	Sum_Fall_Forbs	C4	80	LS	33	Moderatly_Deep	BELOW	0	0.16	0.1647	0	0	Restored_10s
2022-05-25	130	5	1	4	S5T1Q4	41.9017	-89.3431	Asteraceae	Sum_Fall_Forbs	C4	85	SICL	35	Moderatly_Deep	LL	0	0.16	0.0493	0	0	Restored_10s
2022-05-25	131	5	1	5	S5T1Q5	41.9016	-89.3433	Asteraceae	Spring_Forbs	C4	80	L	15	Shallow	LL	0	0.16	0.2368	0	0	Restored_10s
2022-05-25	132	5	2	1	S5T2Q1	41.9016	-89.3423	Poaceae	Warm_Graminoids	C4	80	SIL	14	Shallow	LL	0	0.16	0.9062	0	0	Restored_10s
2022-05-25	133	5	2	2	S5T2Q2	41.9016	-89.3421	Poaceae	Warm_Graminoids	C4	70	SICL	23	Moderatly_Deep	AT	0	0.16	0.2087	0	0	Restored_10s
2022-05-25	134	5	2	3	S5T2Q3	41.9016	-89.3419	Poaceae	Warm_Graminoids	C4	60	SICL	24	Moderatly_Deep	LL	0	0.16	1.7822	0	0	Restored_10s
2022-05-25	135	5	2	4	S5T2Q4	41.9016	-89.3416	Apiaceae	Sum_Fall_Forbs	C3	60	SL	22	Moderatly_Deep	LL	0	0.16	0.4878	0	0	Restored_10s
2022-05-25	136	5	2	5	S5T2Q5	41.9016	-89.3414	Asteraceae	Sum_Fall_Forbs	C4	60	L	32	Moderatly_Deep	LL	0	0.16	0.3003	0	0	Restored_10s
2022-05-25	137	5	3	1	S5T3Q1	41.9014	-89.3424	Asteraceae	Sum_Fall_Forbs	C4	80	SIL	9	Very_Shallow	AT	0	0.16	0.5285	0	0	Restored_10s
2022-05-25	138	5	3	2	S5T3Q2	41.9014	-89.3426	Asteraceae	Sum_Fall_Forbs	C4	85	SIL	11	Shallow	AT	0	0.16	0.1612	0	0	Restored_10s
2022-05-25	139	5	3	3	S5T3Q3	41.9014	-89.3428	Apiaceae	Sum_Fall_Forbs	C3	80	SIL	23	Moderatly_Deep	AT	0	0.16	0.102	0	0	Restored_10s
2022-05-25	140	5	3	4	S5T3Q4	41.9014	-89.343	Asteraceae	Sum_Fall_Forbs	C4	80	LS	31	Moderatly_Deep	AT	0	0.16	0.417	0	0	Restored_10s
2022-05-25	141	5	3	5	S5T3Q5	41.9014	-89.3433	Asteraceae	Spring_Forbs	C4	80	L	27	Moderatly_Deep	LL	0	0.16	0.0152	0	0	Restored_10s
2022-05-25	142	5	4	1	S5T4Q1	41.9013	-89.3423	Poaceae	Warm_Graminoids	C4	40	SIL	23	Moderatly_Deep	AT	0	0.16	5.3082	0	0	Restored_10s
2022-05-25	143	5	4	2	S5T4Q2	41.9014	-89.3421	Poaceae	Warm_Graminoids	C4	50	SICL	13	Shallow	AT	0	0.16	0.7145	0	0	Restored_10s
2022-05-25	144	5	4	3	S5T4Q3	41.9014	-89.3418	Asteraceae	Sum_Fall_Forbs	C4	55	SIL	16	Shallow	AT	0	0.16	0.7345	0	0	Restored_10s
2022-05-25	145	5	4	4	S5T4Q4	41.9014	-89.3416	Lamiaceae	Sum_Fall_Forbs	C3	55	SICL	34	Moderatly_Deep	AT	0	0.16	0.5062	0	0	Restored_10s
2022-05-25	146	5	4	5	S5T4Q5	41.9014	-89.3413	Fabaceae	Legumes	C3	75	SICL	23	Moderatly_Deep	BELOW	0	0.16	0.3046	0	0	Restored_10s
2022-05-25	147	5	5	1	S5T5Q1	41.9012	-89.3423	Poaceae	Warm_Graminoids	C4	50	SIL	5	Very_Shallow	AT	0	0.16	1.222	0	0	Restored_10s
2022-05-25	148	5	5	2	S5T5Q2	41.9012	-89.3425	Poaceae	Warm_Graminoids	C4	75	SICL	9	Very_Shallow	AT	0	0.16	3.2476	0	0	Restored_10s
2022-05-25	149	5	5	3	S5T5Q3	41.9012	-89.3428	Poaceae	Warm_Graminoids	C4	65	SIL	9	Very_Shallow	AT	0	0.16	0.3506	0	0	Restored_10s
2022-05-25	150	5	5	4	S5T5Q4	41.9012	-89.343	Asteraceae	Sum_Fall_Forbs	C4	75	SIL	11	Shallow	AT	0	0.16	0.032	0	0	Restored_10s
2022-05-25	151	5	5	5	S5T5Q5	41.9011	-89.3432	Rosaceae	Woody_Shrub	C3	75	SICL	12	Shallow	AT	0	0.16	0.4766	0	0	Restored_10s
2022-05-25	152	5	6	1	S5T6Q1	41.9011	-89.3422	Poaceae	Warm_Graminoids	C4	60	SICL	5	Very_Shallow	AT	0	0.16	0.5507	0	0	Restored_10s
2022-05-25	153	5	6	2	S5T6Q2	41.901	-89.342	Poaceae	Warm_Graminoids	C4	65	L	14	Shallow	AT	0	0.16	0.3621	0	0	Restored_10s
2022-05-25	154	5	6	3	S5T6Q3	41.901	-89.3418	Poaceae	Warm_Graminoids	C4	80	SICL	9	Very_Shallow	AT	0	0.16	1.0508	0	0	Restored_10s
2022-05-25	155	5	6	4	S5T6Q4	41.901	-89.3415	Poaceae	Warm_Graminoids	C4	70	SICL	15	Shallow	AT	0	0.16	1.773	0	0	Restored_10s
2022-05-25	156	5	6	5	S5T6Q5	41.901	-89.3414	Asteraceae	Sum_Fall_Forbs	C4	60	SICL	8	Very_Shallow	AT	0	0.16	0.9857	0	0	Restored_10s
2022-06-02	157	6	1	1	S6T1Q1	41.8927	-89.3774	Cyperaceae	Warm_Graminoids	C4	55	SIL	1	Very_Shallow	AT	7	7.44	3.4396	1	1	Remnant
2022-06-02	158	6	1	2	S6T1Q2	41.8928	-89.3772	Asteraceae	Sum_Fall_Forbs	C4	50	SIL	16	Shallow	AT	0	0.16	0.7711	0	0	Remnant
2022-06-02	159	6	1	3	S6T1Q3	41.8929	-89.377	Asteraceae	Sum_Fall_Forbs	C4	65	LS	36	Deep	BELOW	0	0.16	0.8602	0	0	Remnant
2022-06-02	160	6	1	4	S6T1Q4	41.893	-89.3768	Asteraceae	Sum_Fall_Forbs	C4	60	LS	30	Moderatly_Deep	BELOW	0	0.16	0.8705	0	0	Remnant
2022-06-02	161	6	1	5	S6T1Q5	41.8931	-89.3766	Asteraceae	Sum_Fall_Forbs	C4	50	SIL	3	Very_Shallow	AT	0	0.16	1.0149	0	0	Remnant
2022-06-02	162	6	1	6	S6T1Q6	41.8932	-89.3764	Poaceae	Warm_Graminoids	C4	60	SL	9	Very_Shallow	AT	0	0.16	1.1911	0	0	Remnant
2022-06-02	163	6	2	1	S6T2Q1	41.8928	-89.3775	Poaceae	Warm_Graminoids	C4	65	SIL	5	Very_Shallow	AT	0	0.16	2.4117	0	0	Remnant
2022-06-02	164	6	2	2	S6T2Q2	41.8927	-89.3777	Asteraceae	Sum_Fall_Forbs	C4	60	LS	30	Moderatly_Deep	BELOW	8	8.48	0.5828	0	0	Remnant
2022-06-02	165	6	2	3	S6T2Q3	41.8927	-89.3779	Asteraceae	Sum_Fall_Forbs	C4	50	SIL	1	Very_Shallow	AT	8	8.48	1.0766	0	0	Remnant
2022-06-02	166	6	2	4	S6T2Q4	41.8926	-89.3781	Asteraceae	Sum_Fall_Forbs	C4	12	SIL	1	Very_Shallow	AT	30	31.36	0.2506	0	0	Remnant
2022-06-02	167	6	2	5	S6T2Q5	41.8924	-89.3782	Lamiaceae	Sum_Fall_Forbs	C3	55	SIL	9	Very_Shallow	AT	0	0.16	2.04	0	0	Remnant
2022-06-02	168	6	2	6	S6T2Q6	41.8922	-89.3784	Cyperaceae	Warm_Graminoids	C4	65	SL	7	Very_Shallow	AT	0	0.16	0.7373	0	0	Remnant
2022-06-02	169	6	3	1	S6T3Q1	41.8929	-89.3775	Asteraceae	Sum_Fall_Forbs	C4	55	SIL	7	Very_Shallow	AT	0	0.16	4.532	0	0	Remnant
2022-06-02	170	6	3	2	S6T3Q2	41.893	-89.3773	Poaceae	Warm_Graminoids	C4	50	SIL	1	Very_Shallow	AT	0	0.16	0.6668	0	0	Remnant
2022-06-02	171	6	3	3	S6T3Q3	41.8931	-89.3771	Onocleaceae	Woody_Shrub	C3	55	SIL	2	Very_Shallow	AT	0	0.16	1.2687	0	0	Remnant
2022-06-02	172	6	3	4	S6T3Q4	41.8932	-89.3769	Cyperaceae	Warm_Graminoids	C4	45	SL	7	Very_Shallow	AT	7	7.44	3.5138	0	0	Remnant
2022-06-02	173	6	3	5	S6T3Q5	41.8933	-89.3767	Asteraceae	Sum_Fall_Forbs	C4	55	L	5	Very_Shallow	AT	17	17.84	2.386	0	0	Remnant
2022-06-02	174	6	3	6	S6T3Q6	41.8943	-89.3765	Asteraceae	Sum_Fall_Forbs	C4	55	SIL	35	Moderatly_Deep	BELOW	2	2.24	1.5039	0	0	Remnant
2022-06-02	175	6	4	1	S6T4Q1	41.8933	-89.3781	Lamiaceae	Sum_Fall_Forbs	C3	75	SL	4	Very_Shallow	AT	7	7.44	3.1281	0	0	Remnant
2022-06-02	176	6	4	2	S6T4Q2	41.8934	-89.3778	Typhaceae	Cool_Graminoids	C3	40	L	5	Very_Shallow	AT	0	0.16	0.0006	0	0	Remnant
2022-06-02	177	6	4	3	S6T4Q3	41.8935	-89.3777	Cyperaceae	Warm_Graminoids	C4	35	SIL	6	Very_Shallow	AT	0	0.16	0.1949	0	0	Remnant
2022-06-02	178	6	4	4	S6T4Q4	41.8937	-89.3775	Lamiaceae	Sum_Fall_Forbs	C3	50	SIL	1	Very_Shallow	AT	0	0.16	2.4185	0	0	Remnant
2022-06-02	179	6	4	5	S6T4Q5	41.8938	-89.3774	Lamiaceae	Sum_Fall_Forbs	C3	45	L	10	Very_Shallow	AT	8	8.48	1.6329	0	0	Remnant
2022-06-02	180	6	4	6	S6T4Q6	41.8939	-89.3772	Cyperaceae	Warm_Graminoids	C4	50	SL	12	Shallow	AT	40	41.76	0.9354	0	0	Remnant
2022-06-02	181	6	5	1	S6T5Q1	41.8933	-89.3782	Cyperaceae	Warm_Graminoids	C4	65	SIL	5	Very_Shallow	AT	0	0.16	2.6195	1	3	Remnant
2022-06-02	182	6	5	2	S6T5Q2	41.8932	-89.3784	Cyperaceae	Warm_Graminoids	C4	25	SICL	28	Moderatly_Deep	AT	0	0.16	3.2487	0	0	Remnant
2022-06-02	183	6	5	3	S6T5Q3	41.893	-89.3785	Cyperaceae	Warm_Graminoids	C4	30	SICL	8	Very_Shallow	AT	12	12.64	3.1819	1	1	Remnant
2022-06-02	184	6	5	4	S6T5Q4	41.8929	-89.3787	Cyperaceae	Warm_Graminoids	C4	40	SIL	5	Very_Shallow	AT	0	0.16	1.1596	1	3	Remnant
2022-06-02	185	6	5	5	S6T5Q5	41.8927	-89.3788	Asteraceae	Sum_Fall_Forbs	C4	55	SIL	12	Shallow	AT	14	14.72	0.8188	0	0	Remnant
2022-06-02	186	6	5	6	S6T5Q6	41.8927	-89.3789	Rosaceae	Woody_Shrub	C3	60	SICL	11	Shallow	AT	0	0.16	1.4142	0	0	Remnant
2022-06-02	187	6	6	1	S6T6Q1	41.8934	-89.3782	Asteraceae	Sum_Fall_Forbs	C4	35	SIL	5	Very_Shallow	AT	0	0.16	0.5541	1	6	Remnant
2022-06-02	188	6	6	2	S6T6Q2	41.8933	-89.3785	Asteraceae	Sum_Fall_Forbs	C4	55	SL	7	Very_Shallow	AT	0	0.16	1.0892	0	0	Remnant
2022-06-02	189	6	6	3	S6T6Q3	41.8932	-89.3787	Asteraceae	Sum_Fall_Forbs	C4	45	SIL	6	Very_Shallow	AT	63	65.68	5.2294	1	3	Remnant
2022-06-02	190	6	6	4	S6T6Q4	41.8931	-89.3789	Cyperaceae	Warm_Graminoids	C4	45	SIL	16	Shallow	AT	38	39.68	3.9121	0	0	Remnant
2022-06-02	191	6	6	5	S6T6Q5	41.8931	-89.3792	Lamiaceae	Sum_Fall_Forbs	C3	55	SIL	4	Very_Shallow	AT	0	0.16	0.7322	1	1	Remnant
2022-06-02	192	6	6	6	S6T6Q6	41.8931	-89.3794	Asteraceae	Sum_Fall_Forbs	C4	7	SL	1	Very_Shallow	AT	0	0.16	0.8363	1	2	Remnant
